# Supplementary material for: Continuous-flow stereoselective reduction of prochiral ketones in a whole cell bioreactor with natural deep eutectic solvents
Source: Royal Society of Chemistry journal article supplement (doi:10.1039/d1gc03786b), 2021-12-14
Supplement: d1gc03786b1.pdf [file d1gc03786b1.pdf]

## Supporting information

### Continuous-flow stereoselective reduction of prochiral ketones in a whole cell bioreactor with natural deep eutectic solvents

Francesca Annunziata,<sup>a</sup> Alessandra Guaglio,<sup>a</sup> Paola Conti,<sup>a</sup> Lucia Tamborini\*<sup>a</sup> and Raffaella Gandolfi<sup>a</sup>

<sup>1</sup> Department of Pharmaceutical Sciences, University of Milan, via Mangiagalli 25, 20133 Milan, Italy.

\*Correspondence: lucia.tamborini@unimi.it; Tel.: + 39 0250319367

#### Contents

- HPLC chromatograms of racemic and chiral  $\beta$ -hydroxynitriles
- <sup>1</sup>H-NMR and <sup>13</sup>C-NMR of compound **2f**

## HPLC chromatograms of racemic and chiral $\beta$ -hydroxynitriles

Chiral HPLC analyses were performed with a Merck-Hitachi L-7100 instrument equipped with Detector UV6000LP and a chiral column (OJ-H Chiralcel). Eluent hexane : 2-propanol = 90:10, flow = 1 mL/min,  $\lambda$  = 216 nm; room temperature.

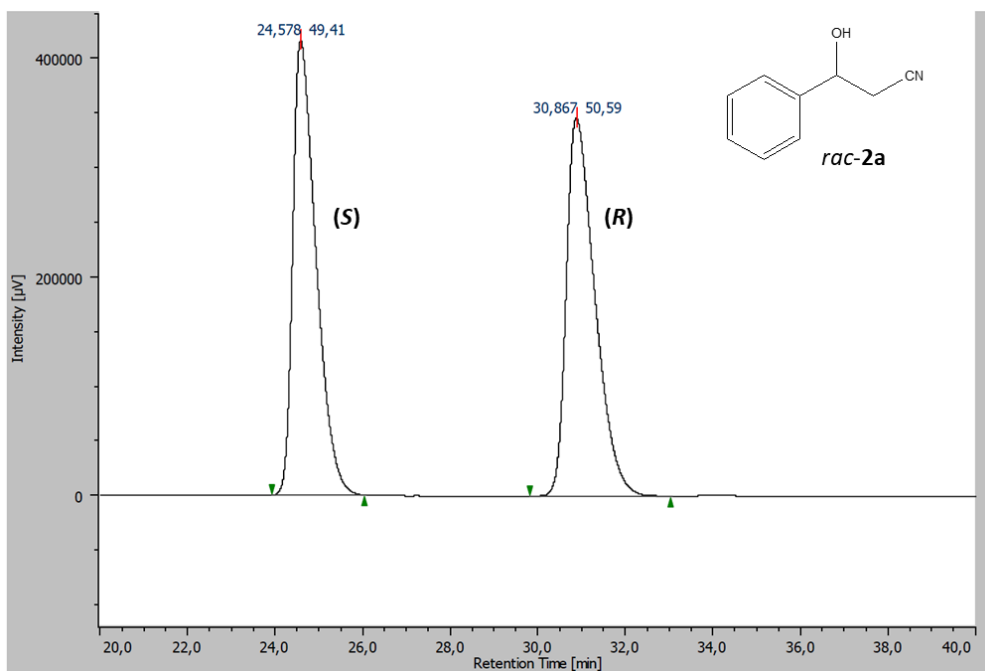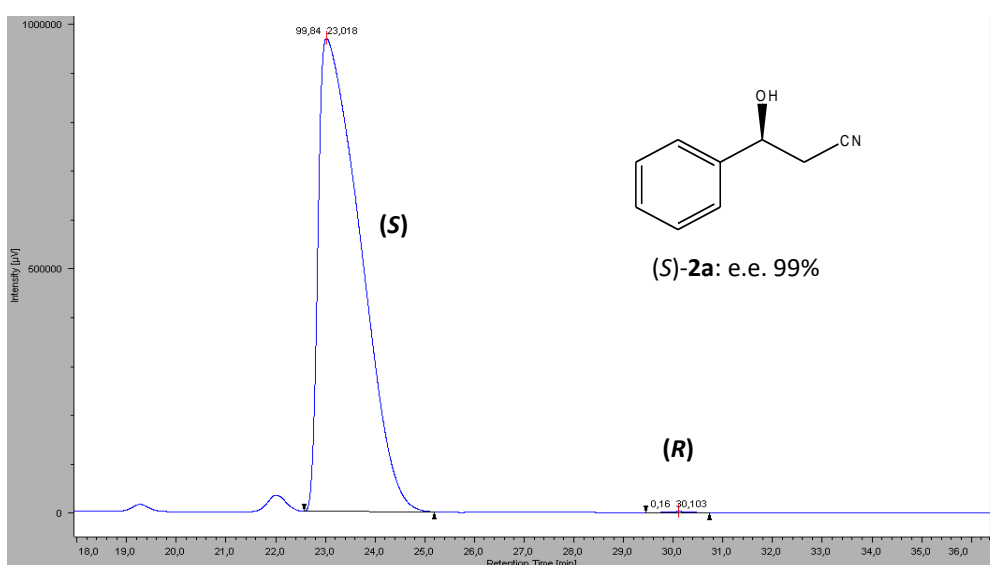

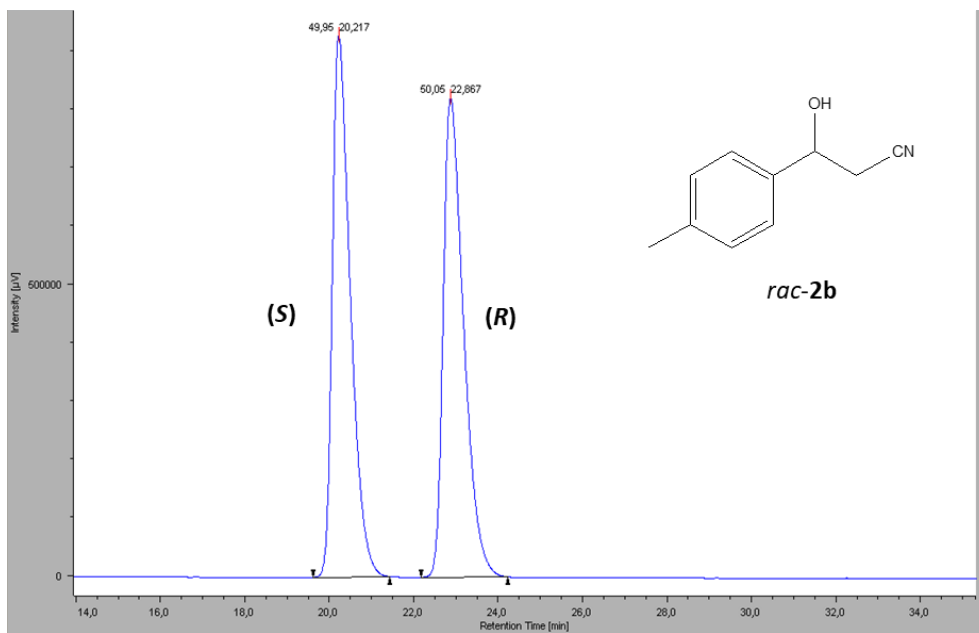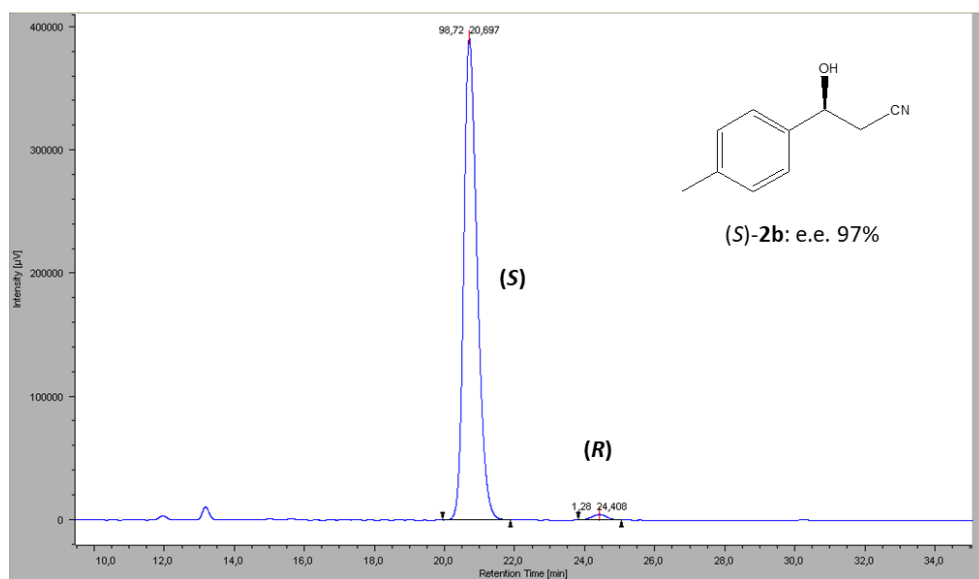

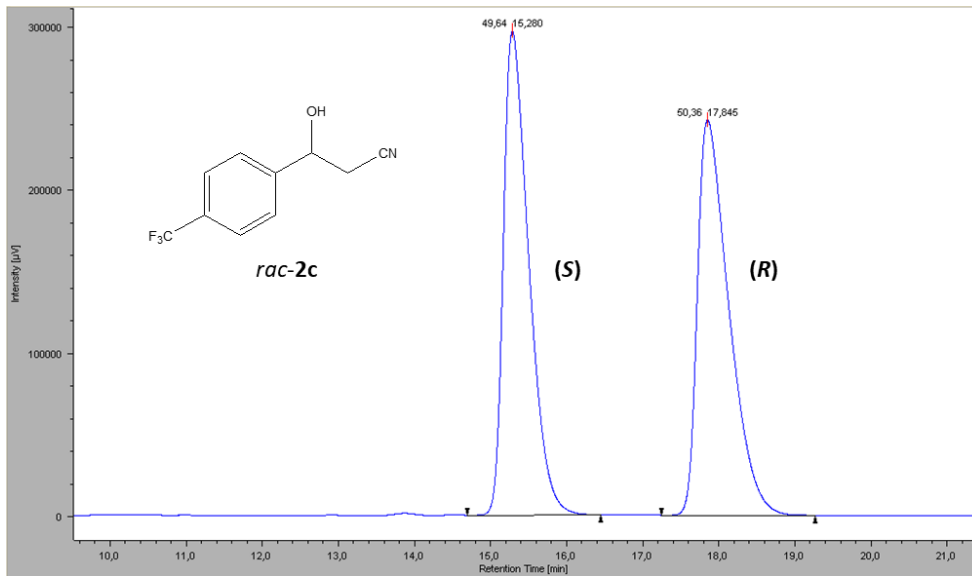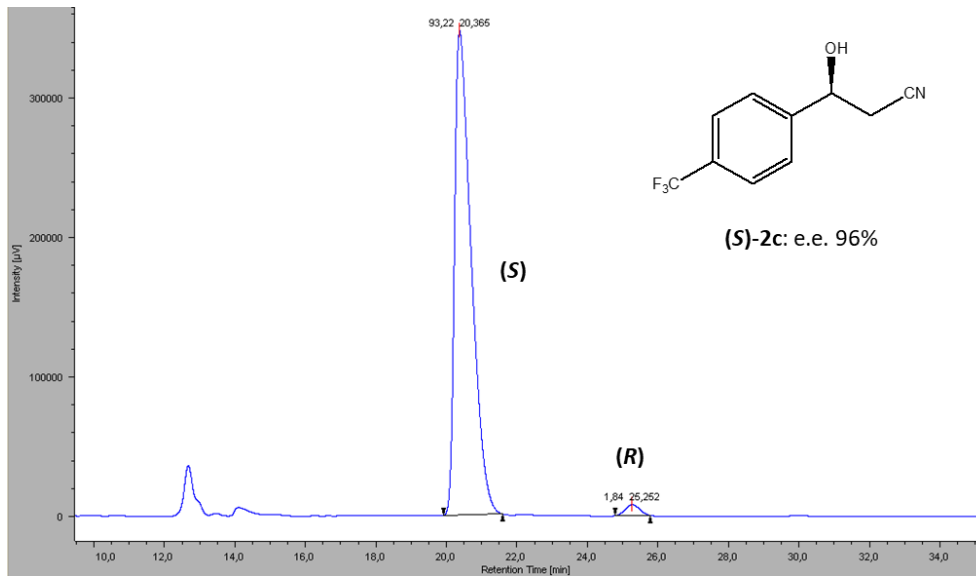

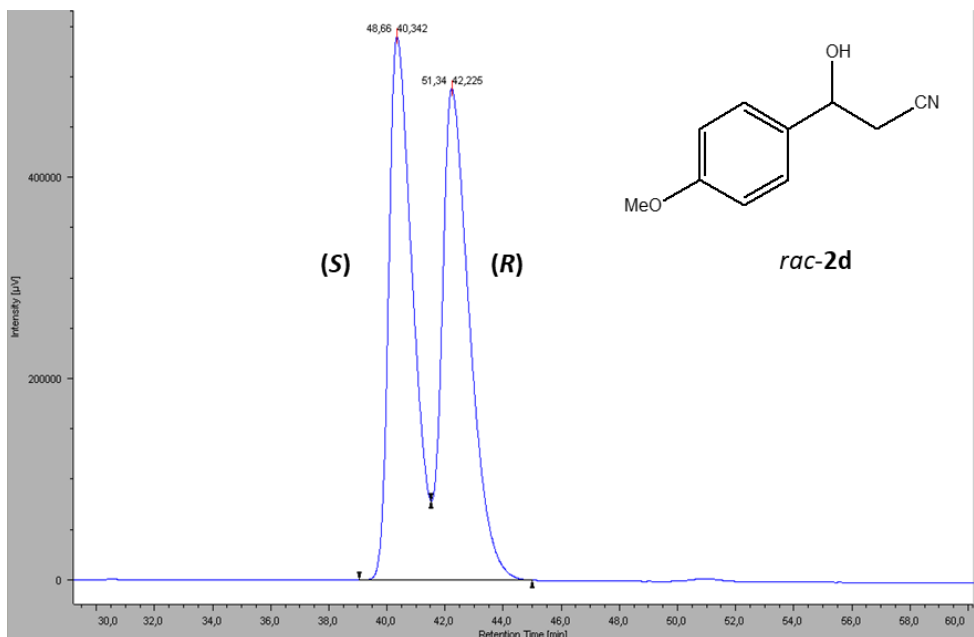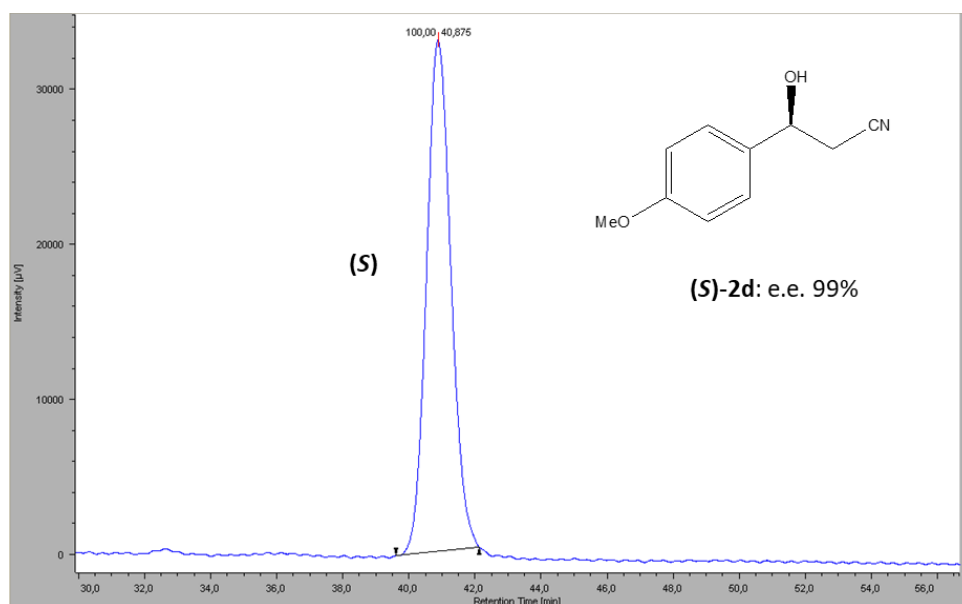

Compound (S)-2d was purified and the  $\alpha_D$  value was measured:  $[\alpha]_D^{28} = -52.0$  ( $c = 1.0$ , EtOH).<sup>1,2</sup> Rotary power determination was carried out using a Jasco P-1010 spectropolarimeter, coupled with a Haake N3-B thermostat.

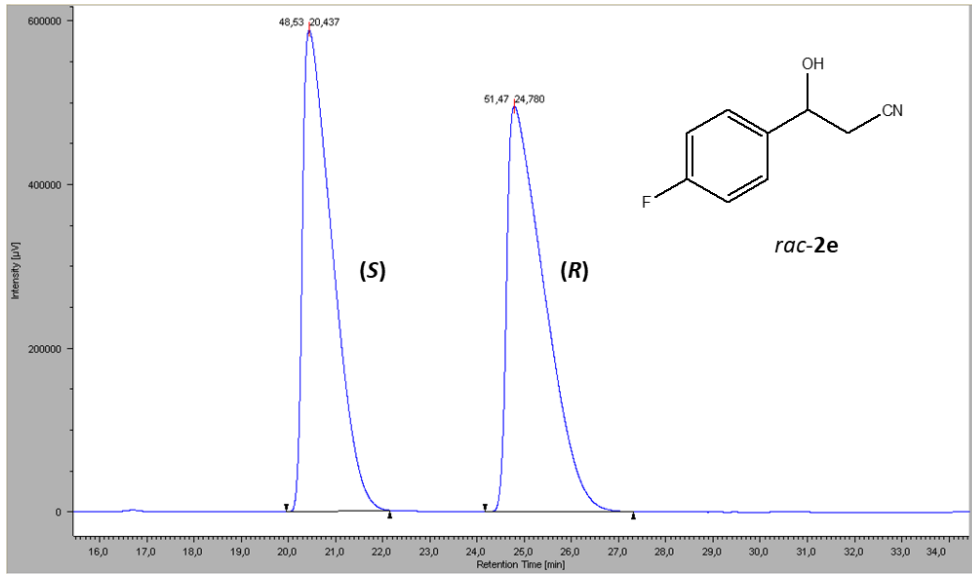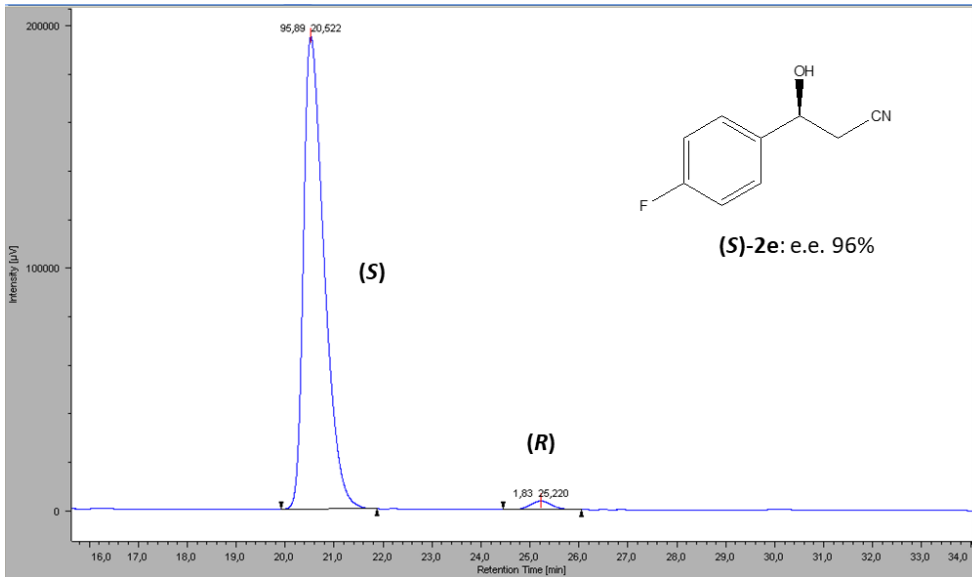

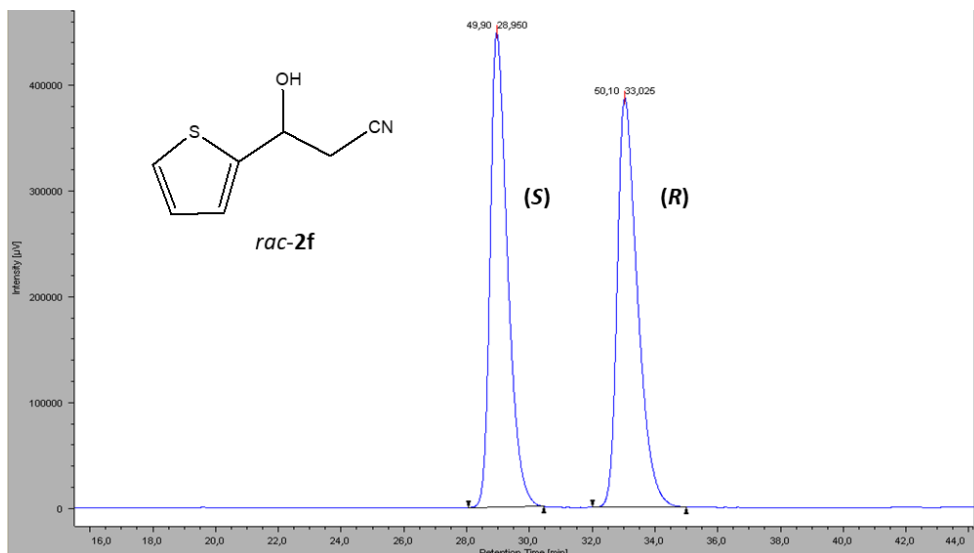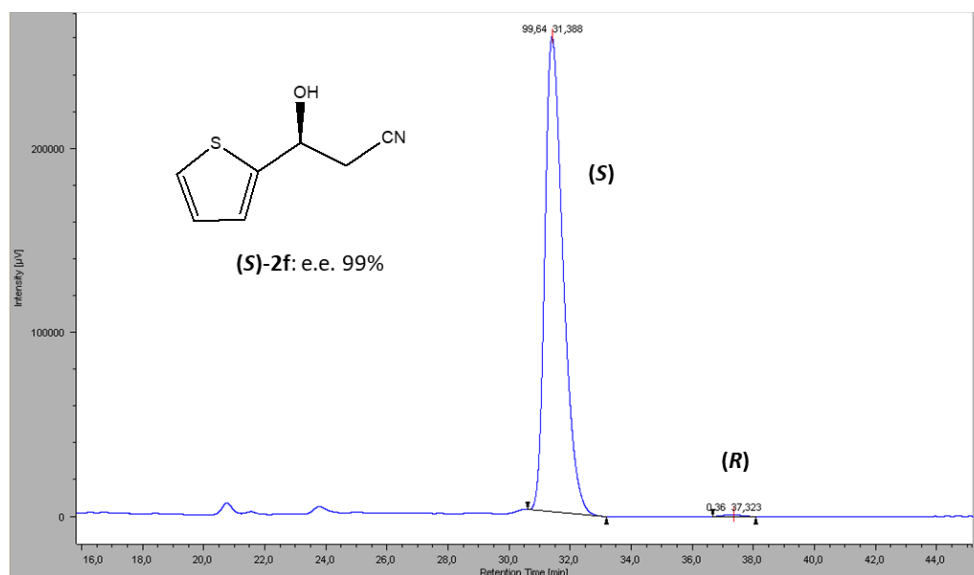

(S)-2f

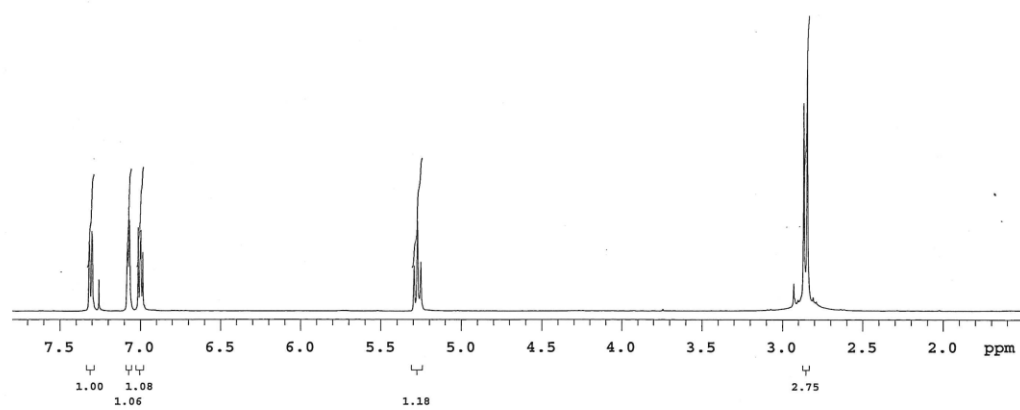

(S)-2f

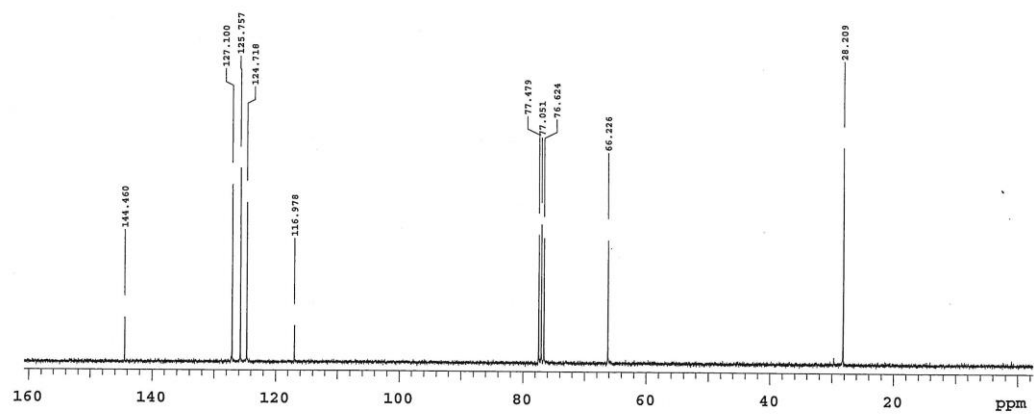



## References

- 1 M. L. Contente, I. Serra, F. Molinari· R. Gandolfi, A. Pinto and D. Romano, *Tetrahedron*, 2016, **72**, 3974-3979.
- 2 H. Vzquez-Villa, S. Reber, M. A. Ariger and E. M. Carreira, *Angew. Chem. Int. Ed.*, 2011, **50**, 8979 –8981
